# Supplementary material
Source: PubMed Central journal article supplement (PMC6233743)
Supplement: jamadermatol-154-1145-s001.pdf [file jamadermatol-154-1145-s001.pdf]

## Supplementary Online Content

Lee S, Kim BJ, Lee YB, Lee WS. Hair Regrowth Outcomes of Contact Immunotherapy for Patients With Alopecia Areata: A Systematic Review and Meta-analysis. *JAMA Dermatol*. Published online August 01, 2018. doi:10.1001/jamadermatol.2018.2312

Supplement. eText 1. Search strategy

eFigure 1. Literature search

eTable 1. Definition of therapeutic regrowth

eTable 2. Study characteristics and quality assessment

eTable 3. Sensitivity analysis

eTable 4. Treatment-related adverse effects

eReferences

This supplementary material has been provided by the authors to give readers additional information about their work.

## eText 1. Search strategy

### MEDLINE

("areata"[title] OR "totalis"[title] OR "universalis"[title]) AND  
("sensitizer"[title] OR "sensitization"[title] OR "immunotherapy"[title] OR  
"Diphenylcyclopropenone"[title] OR "diphenylcyclopropenone"[title] OR "diphencyprone"[title] OR  
"Squaric acid dibutyl ester"[title] OR "squaric"[title])

### Embase

('areata':ti OR 'totalis':ti OR 'universalis':ti) AND  
( 'sensitizer':ti OR 'sensitization':ti OR 'immunotherapy':ti OR  
'Diphenylcyclopropenone':ti OR 'diphenylcyclopropenone':ti OR 'diphencyprone':ti OR  
'Squaric acid dibutyl ester':ti OR 'squaric':ti)

### Cochrane Library

#1: 'areata':ti OR 'totalis':ti OR 'universalis':ti

#2: 'sensitizer':ti OR 'sensitization':ti OR 'immunotherapy':ti OR  
'Diphenylcyclopropenone':ti OR 'diphenylcyclopropenone':ti OR 'diphencyprone':ti OR  
'Squaric acid dibutyl ester':ti OR 'squaric':ti

Final query: #1 AND #2

**eFigure 1. Literature search**

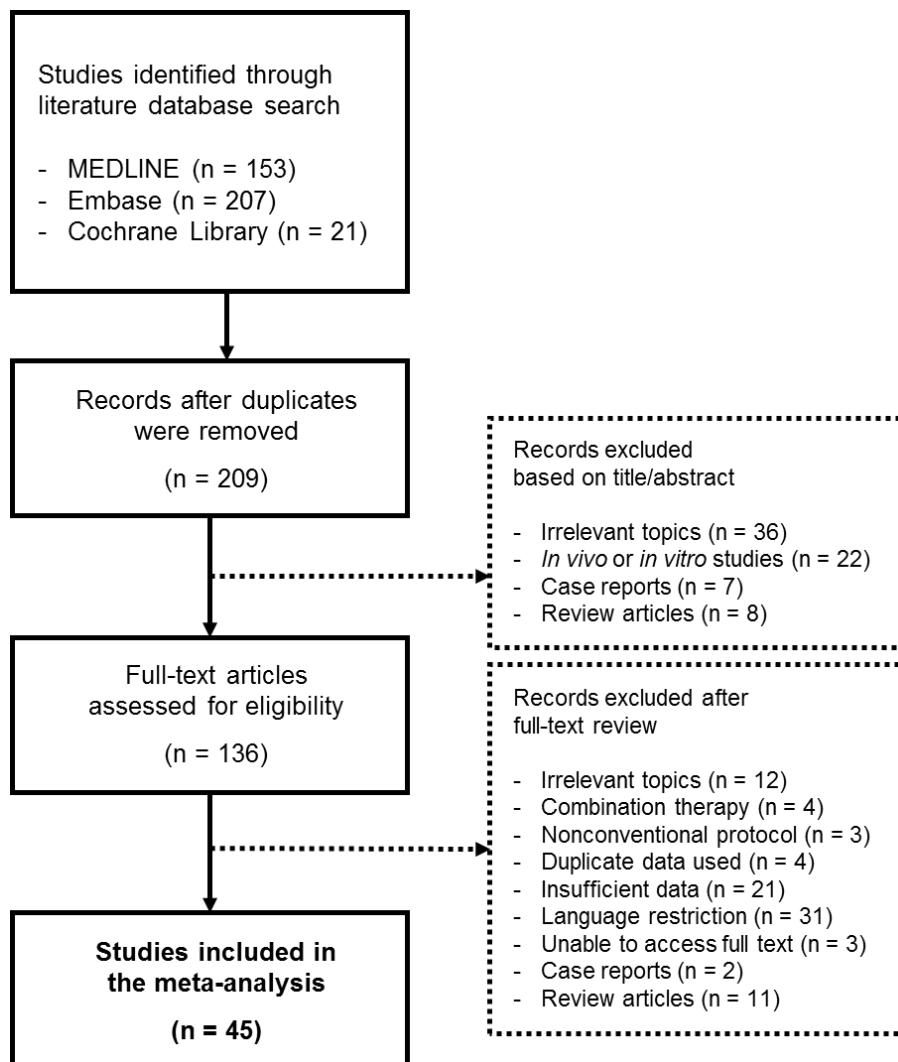

PRISMA flow diagram of literature search and study selection for the systematic review of studies on contact immunotherapy for patients with alopecia areata.

**eTable 1. Definition of therapeutic regrowth**

| <b>Grade</b>             | <b>Quantitative criteria<sup>a</sup></b> | <b>Qualitative criteria</b>                                                                                                                                              |
|--------------------------|------------------------------------------|--------------------------------------------------------------------------------------------------------------------------------------------------------------------------|
| <b>Any regrowth</b>      | <10% regrowth                            | Any or little regrowth<br>Hull and Norris <sup>29</sup> grade I (vellus hair)<br>Any improvement in Hull and Norris grade<br>No clear definition of therapeutic regrowth |
| <b>Minor regrowth</b>    | 10–59% regrowth                          | Partial, some, good, or moderate regrowth<br>Cosmetically unacceptable regrowth<br>Hull and Norris grade II<br>(sparse terminal hair)                                    |
| <b>Major regrowth</b>    | 60–89% regrowth                          | Diffuse or persistent regrowth<br>Cosmetically acceptable regrowth<br>Hull and Norris grade III<br>(terminal hair with patchy alopecia)                                  |
| <b>Complete regrowth</b> | 90–100% regrowth                         | Complete or excellent regrowth<br>Hull and Norris grade IV<br>(terminal hair all over the head)                                                                          |

<sup>a</sup>Only studies using quantitative criteria for therapeutic regrowth were included in the sensitivity analysis (see eTable 3).

**eTable 2. Study characteristics and quality assessment**

| Study name                     | Study setting  | Sensitizer                                         | Study population                    | Total, n | Female, n | Age, y | AT/AU, n | Follow-up, m | Any regrowth | Minor regrowth | Major regrowth | Complete regrowth | SA LT ≥ 50 | Duration ≥ 1 y | Atopic disease | Nail involvement | Adverse effects | Recurrence rate |
|--------------------------------|----------------|----------------------------------------------------|-------------------------------------|----------|-----------|--------|----------|--------------|--------------|----------------|----------------|-------------------|------------|----------------|----------------|------------------|-----------------|-----------------|
| Thuangtong et al <sup>30</sup> | Thailand, 2017 | Diphenylcyclopropanone                             | Recalcitrant AT/AU                  | 20       | 12        | 35     | 20       | 2.7          | -            | -              | 0              | -                 | 0          | -              | -              | -                | 0               | -               |
| Tiwary et al <sup>31</sup>     | India, 2016    | Diphenylcyclopropanone, squaric acid dibutyl ester | AA (>20%)                           | 24       | 10        | NA     | 0        | 6            | -            | 0              | 0              | -                 | 0          | -              | -              | -                | 0               | -               |
| Lamb et al <sup>32</sup>       | UK, 2016       | Diphenylcyclopropanone                             | AA                                  | 133      | 99        | 35     | 53       | NA           | 0            | -              | -              | 0                 | 0          | 0              | 0              | 0                | 0               | -               |
| Durdu et al <sup>33</sup>      | Turkey, 2015   | Diphenylcyclopropanone                             | Chronic, extensive, recalcitrant AA | 22       | 9         | 17     | 9        | 12           | -            | 0              | 0              | -                 | 0          | -              |                |                  | 0               | 0               |
| Chiang et al <sup>34</sup>     | US, 2015       | Diphenylcyclopropanone                             | AA                                  | 50       | 36        | 37.5   | 39       | 36           | -            | 0              | -              | -                 | 0          | -              |                |                  | 0               | 0               |
| Luk et al <sup>35</sup>        | China, 2013    | Diphenylcyclopropanone                             | AA                                  | 29       | 15        | 28.9   | 15       | NA           | 0            | -              | 0              | 0                 | 0          | 0              | 0              | 0                | 0               | 0               |
| Khoury et al <sup>36</sup>     | Lebanon, 2013  | Diphenylcyclopropanone                             | AA                                  | 34       | 15        | 24.72  | 14       | 16           | -            | -              | -              | -                 | 0          | -              | -              | -                | 0               | 0               |
| Dhurat et al <sup>37</sup>     | India, 2013    | Diphenylcyclopropanone                             | AA with at least two patches        | 29       | NA        | NA     | 0        | 6            | 0            | -              | -              | -                 | 0          | -              | -              | -                | -               | -               |

| Study name                     | Study setting | Sensitizer                 | Study population                       | Total, n | Female, n | Age, y | AT/AU, n | Follow-up, m | Any regrowth | Minor regrowth | Major regrowth | Complete regrowth | SA LT ≥ 50 | Duration ≥ 1 y | Atopic disease | Nail involvement | Adverse effects | Recurrence rate |
|--------------------------------|---------------|----------------------------|----------------------------------------|----------|-----------|--------|----------|--------------|--------------|----------------|----------------|-------------------|------------|----------------|----------------|------------------|-----------------|-----------------|
| Ohlmeier et al <sup>38</sup>   | Germany, 2012 | Diphenylcyclopropanone     | AA                                     | 135      | 95        | 36     | 24       | 20           | 0            | -              | -              | -                 | 0          | -              | -              | -                | -               | 0               |
| Khan et al <sup>39</sup>       | UK, 2011      | Diphenylcyclopropanone     | AA                                     | 60       | 43        | NA     | 22       | 10.5         | 0            | 0              | -              | -                 | 0          | -              | -              | -                | 0               | 0               |
| Bhat et al <sup>40</sup>       | UK, 2011      | Diphenylcyclopropanone     | Recalcitrant AA                        | 29       | 23        | NA     | 14       | 12           | -            | 0              | -              | -                 | 0          | -              | -              | -                | -               | 0               |
| Avgerinou et al <sup>41</sup>  | Greece, 2007  | Diphenylcyclopropanone     | Extensive or chronic (>25% or >1 year) | 54       | 15        | 27.2   | 6        | 6.1          | -            | -              | -              | -                 | 0          | -              | -              | -                | 0               | 0               |
| Sotiriadis et al <sup>42</sup> | Greece, 2006  | Diphenylcyclopropanone     | Severe AA (>50%)                       | 38       | 19        | 24.5   | 16       | 12           | -            | 0              | 0              | 0                 | 0          | 0              | 0              | -                | 0               | 0               |
| Ajith et al <sup>43</sup>      | India, 2006   | Squaric acid dibutyl ester | Recalcitrant AA                        | 60       | 32        | 25     | 20       | 3.2          | -            | 0              | -              | -                 | 0          | -              | 0              | 0                | 0               | 0               |
| Kwon et al <sup>44</sup>       | Korea, 2005   | Squaric acid dibutyl ester | AA (>25%)                              | 22       | 12        | 27.8   | 7        | 6            | 0            | -              | -              | -                 | 0          | -              | -              | -                | 0               | 0               |
| Dall'oglio et al <sup>45</sup> | Italy, 2005   | Squaric acid dibutyl ester | Recalcitrant AA (>40%)                 | 54       | 26        | 25     | 23       | 8            | -            | -              | 0              | 0                 | 0          | -              | -              | -                | -               | 0               |
| Mun et al <sup>46</sup>        | Korea, 2004   | Diphenylcyclopropanone     | Recalcitrant AA                        | 36       | 23        | NA     | 10       | NA           | 0            | -              | 0              | 0                 | 0          | -              | 0              | 0                | 0               | -               |

| Study name                      | Study setting     | Sensitizer                 | Study population    | Total, n | Female, n | Age, y | AT/AU, n | Follow-up, m | Any regrowth | Minor regrowth | Major regrowth | Complete regrowth | SA LT ≥ 50 | Duration ≥ 1 y | Atopic disease | Nail involvement | Adverse effects | Recurrence rate |
|---------------------------------|-------------------|----------------------------|---------------------|----------|-----------|--------|----------|--------------|--------------|----------------|----------------|-------------------|------------|----------------|----------------|------------------|-----------------|-----------------|
|                                 |                   |                            | (>25%)              |          |           |        |          |              |              |                |                |                   |            |                |                |                  |                 |                 |
| Lee et al <sup>47</sup>         | Korea, 2004       | Diphenylcyclopropanone     | Extensive AA (>50%) | 39       | 17        | 25     | 16       | 5.8          | -            | -              | 0              | 0                 | 0          | 0              | -              | -                | 0               | 0               |
| Wiseman et al <sup>48</sup>     | Canada, 2001      | Diphenylcyclopropanone     | AA (>25%)           | 148      | 91        | 36.3   | 35       | 7.2          | -            | 0              | -              | -                 | 0          | -              | -              | -                | 0               | 0               |
| Pardasani et al <sup>49</sup>   | US, 2001          | Squaric acid dibutyl ester | AA                  | 36       | 22        | 27.2   | 8        | 7            | 0            | -              | -              | -                 | 0          | -              | -              | 0                | -               | -               |
| Pericin et al <sup>50</sup>     | Switzerland, 1998 | Diphenylcyclopropanone     | Severe AA (>40%)    | 68       | 36        | NA     | 52       | 15.8         | 0            | -              | 0              | 0                 | 0          | -              | -              | -                | 0               | 0               |
| Iijima et al <sup>13</sup>      | Japan, 1997       | Squaric acid dibutyl ester | AA (>25%)           | 48       | 32        | NA     | 14       | 6            | 0            | -              | -              | -                 | 0          | 0              | 0              | -                | -               | -               |
| Amer et al <sup>51</sup>        | Egypt, 1997       | Diphenylcyclopropanone     | AA                  | 49       | 21        | NA     | 27       | NA           | 0            | 0              | 0              | 0                 | 0          | -              | -              | -                | 0               | -               |
| Weise et al <sup>52</sup>       | Germany, 1996     | Diphenylcyclopropanone     | Severe AA           | 105      | 78        | 32     | 62       | NA           | -            | 0              | -              | -                 | 0          | -              | 0              | 0                | -               | -               |
| Tosti et al <sup>53</sup>       | Italy, 1996       | Squaric acid dibutyl ester | Pediatric severe AA | 33       | 13        | 9.5    | 33       | NA           | 0            | -              | 0              | 0                 | 0          | -              | 0              | 0                | 0               | 0               |
| Schuttelaar et al <sup>24</sup> | Netherlands, 1996 | Diphenylcyclopropanone     | Pediatric AA        | 25       | 14        | 10.7   | 15       | 10.8         | 0            | -              | 0              | 0                 | 0          | 0              | 0              | -                | -               | -               |
| Micali                          | Italy,            | Squaric acid               | Recal               | 14       | 77        | 23     | 15       | 12           | -            | -              | -              | -                 | 0          | -              | -              | -                | -               | -               |



| Study name                        | Study setting     | Sensitizer                 | Study population                 | Total, n | Female, n | Age, y | AT/AU, n | Follow-up, m | Any regrowth | Minor regrowth | Major regrowth | Complete regrowth | SA LT ≥ 50 | Duration ≥ 1 y | Atopic disease | Nail involvement | Adverse effects | Recurrence rate |
|-----------------------------------|-------------------|----------------------------|----------------------------------|----------|-----------|--------|----------|--------------|--------------|----------------|----------------|-------------------|------------|----------------|----------------|------------------|-----------------|-----------------|
| et al <sup>54</sup>               | 1996              | dibutyl ester              | citrant AA                       | 4        |           |        |          |              |              |                |                |                   |            |                |                |                  |                 |                 |
| van Baar et al <sup>55</sup>      | Netherlands, 1995 | Diphenylcyclopropanone     | Severe AA                        | 139      | 73        | NA     | 85       | 43           | -            | -              | 0              | 0                 | 0          | -              | -              | -                | 0               | -               |
| Orechia et al <sup>56</sup>       | Italy, 1994       | Squaric acid dibutyl ester | Pediatric recalcitrant AA (>75%) | 28       | 16        | 10     | 11       | NA           | 0            | 0              | -              | -                 | 0          | 0              | 0              | -                | 0               | 0               |
| Shapiro et al <sup>57</sup>       | Canada, 1993      | Diphenylcyclopropanone     | AA (>50%)                        | 7        | 4         | 32.7   | 4        | NA           | -            | 0              | -              | -                 | 0          | 0              | 0              | 0                | -               | 0               |
| van der Steen et al <sup>58</sup> | Netherlands, 1992 | Diphenylcyclopropanone     | AA (>40%)                        | 139      | NA        | NA     | 85       | NA           | -            | 0              | -              | -                 | 0          | 0              | -              | 0                | -               | -               |
| Hull et al <sup>21</sup>          | UK, 1991          | Diphenylcyclopropanone     | Pediatric severe AA              | 12       | 4         | 11.2   | 8        | 7.3          | 0            | -              | 0              | 0                 | 0          | 0              | 0              | -                | 0               | 0               |
| Hull et al <sup>59</sup>          | UK, 1991          | Diphenylcyclopropanone     | AA (>6 months)                   | 78       | 61        | NA     | 45       | 8            | -            | -              | 0              | 0                 | 0          | -              | -              | -                | -               | -               |
| Chun et al <sup>60</sup>          | Korea, 1991       | Diphenylcyclopropanone     | Recalcitrant AA                  | 20       | 6         | 20.1   | 10       | 5            | 0            | -              | 0              | 0                 | 0          | 0              | -              | -                | 0               | -               |
| Berth-Jones                       | UK, 1990          | Diphenylcyclopropanone     | AT (>1 year)                     | 11       | 6         | 39     | 11       | 6            | 0            | -              | -              | -                 | 0          | 0              | -              | -                | -               | -               |

| Study name                    | Study setting | Sensitizer                 | Study population              | Total, n | Female, n | Age, y | AT/AU, n | Follow-up, m | Any regrowth | Minor regrowth | Major regrowth | Complete regrowth | SA LT ≥ 50 | Duration ≥ 1 y | Atopic disease | Nail involvement | Adverse effects | Recurrence rate |
|-------------------------------|---------------|----------------------------|-------------------------------|----------|-----------|--------|----------|--------------|--------------|----------------|----------------|-------------------|------------|----------------|----------------|------------------|-----------------|-----------------|
| et al <sup>61</sup>           |               |                            |                               |          |           |        |          |              |              |                |                |                   |            |                |                |                  |                 |                 |
| Monk et al <sup>62</sup>      | UK, 1989      | Diphenylcyclopropanone     | Extensive AA (>50%, >5 years) | 18       | 10        | 26.9   | 14       | NA           | -            | 0              | -              | -                 | 0          | 0              | -              | -                | 0               | -               |
| Hull et al <sup>63</sup>      | UK, 1988      | Diphenylcyclopropanone     | Extensive AA (>1 year)        | 28       | 25        | NA     | 13       | 8            | -            | -              | -              | -                 | 0          | 0              | -              | -                | -               | -               |
| Hatzis K et al <sup>16</sup>  | Greece, 1988  | Diphenylcyclopropanone     | Extensive AA                  | 45       | 19        | 25.4   | 22       | NA           | 0            | 0              | -              | -                 | 0          | -              | -              | -                | 0               | -               |
| Casero et al <sup>64</sup>    | US, 1987      | Squaric acid dibutyl ester | Recalcitrant AA               | 14       | 11        | 16.5   | 12       | 7.6          | -            | 0              | -              | -                 | 0          | -              | -              | -                | 0               | -               |
| Valsecchi et al <sup>65</sup> | Italy, 1986   | Squaric acid dibutyl ester | Recalcitrant AA               | 45       | NA        | NA     | 23       | NA           | -            | -              | -              | -                 | 0          | -              | -              | -                | -               | 0               |
| Valsecchi et al <sup>66</sup> | Italy, 1985   | Squaric acid dibutyl ester | AA (>30%)                     | 38       | 17        | NA     | 20       | NA           | -            | 0              | -              | -                 | 0          | -              | -              | -                | 0               | -               |
| Orechia et al <sup>12</sup>   | Italy, 1985   | Diphenylcyclopropanone     | AA (>50%)                     | 26       | 11        | NA     | 17       | 5.1          | 0            | -              | 0              | 0                 | 0          | 0              | 0              | 0                | 0               | 0               |
| Case et al <sup>67</sup>      | US, 1984      | Squaric acid dibutyl ester | AA (>30%)                     | 21       | 11        | 34     | 10       | 3            | -            | 0              | 0              | 0                 | 0          | -              | -              | -                | 0               | 0               |
| Giannetti et al <sup>68</sup> | Italy, 1983   | Squaric acid dibutyl ester | AA                            | 26       | 11        | 20     | 6        | 3.6          | -            | 0              | 0              | 0                 | 0          | 0              | 0              | -                | 0               | 0               |

| Study name                  | Study setting | Sensitizer                 | Study population | Total, n | Female, n | Age, y | AT/AU, n | Follow-up, m | Any regrowth | Minor regrowth | Major regrowth | Complete regrowth | SALT $\geq$ 50 | Duration $\geq$ 1 y | Atopic disease | Nail involvement | Adverse effects | Recurrence rate |
|-----------------------------|---------------|----------------------------|------------------|----------|-----------|--------|----------|--------------|--------------|----------------|----------------|-------------------|----------------|---------------------|----------------|------------------|-----------------|-----------------|
| Flowers et al <sup>69</sup> | US, 1982      | Squaric acid dibutyl ester | AA (>30%)        | 8        | 5         | 33.9   | 5        | 2.3          | 0            | -              | 0              | 0                 | 0              | 0                   | -              | -                | 0               | -               |

AT, alopecia totalis; AU, alopecia universalis; AA, alopecia areata; SALT, The Severity of Alopecia Tool; NA, not available

**eTable 3. Sensitivity analysis**

| Original analysis (both quantitative and qualitative studies) |                                   |                                   |                                   |                                   |                                   |                                   |                                   |                                   |
|---------------------------------------------------------------|-----------------------------------|-----------------------------------|-----------------------------------|-----------------------------------|-----------------------------------|-----------------------------------|-----------------------------------|-----------------------------------|
| AA subtype                                                    | Any regrowth                      |                                   | Minor regrowth                    |                                   | Major regrowth                    |                                   | Complete regrowth                 |                                   |
|                                                               | Response rate (%)<br>(95% CI [%]) | No. of studies, (No. of patients) | Response rate (%)<br>(95% CI [%]) | No. of studies, (No. of patients) | Response rate (%)<br>(95% CI [%]) | No. of studies, (No. of patients) | Response rate (%)<br>(95% CI [%]) | No. of studies, (No. of patients) |
| PA                                                            | 74.6<br>(67.9–80.3)               | 15<br>(459)                       | 64.9<br>(57.7–71.6)               | 20<br>(409)                       | 56.1<br>(45.9–65.8)               | 18<br>(430)                       | 42.6<br>(29.9–56.3)               | 17<br>(371)                       |
| AT/AU                                                         | 54.5<br>(46.2–62.6)               | 16<br>(285)                       | 45.0<br>(35.9–54.4)               | 20<br>(357)                       | 28.7<br>(24.1–33.8)               | 18<br>(405)                       | 24.9<br>(18.2–33.0)               | 18<br>(443)                       |
| Overall                                                       | 65.5<br>(59.1–71.3)               | 16<br>(744)                       | 55.5<br>(49.0–61.9)               | 22<br>(766)                       | 39.4<br>(31.8–47.6)               | 19<br>(835)                       | 32.3<br>(25.3–40.2)               | 18<br>(814)                       |
| Sensitivity analysis (quantitative studies only)              |                                   |                                   |                                   |                                   |                                   |                                   |                                   |                                   |
| AA subtype                                                    | -                                 |                                   | 10–59% regrowth                   |                                   | 60–89% regrowth                   |                                   | 90–100% regrowth                  |                                   |
|                                                               | Response rate (%)<br>(95% CI [%]) | No. of studies, (No. of patients) | Response rate (%)<br>(95% CI [%]) | No. of studies, (No. of patients) | Response rate (%)<br>(95% CI [%]) | No. of studies, (No. of patients) | Response rate (%)<br>(95% CI [%]) | No. of studies, (No. of patients) |
| PA                                                            | -                                 | -                                 | 65.1<br>(56.5–72.7)               | 11<br>(275)                       | 52.2<br>(23.2–79.8)               | 4<br>(41)                         | 43.5<br>(26.4–62.4)               | 7<br>(112)                        |
| AT/AU                                                         | -                                 | -                                 | 52.0<br>(37.5–66.1)               | 9<br>(184)                        | 23.3<br>(15.4–33.8)               | 5<br>(83)                         | 27.7<br>(20.4–36.4)               | 7<br>(126)                        |
| Overall                                                       | -                                 | -                                 | 59.8<br>(52.0–67.2)               | 11<br>(459)                       | 39.1<br>(27.5–52.2)               | 5<br>(124)                        | 34.4<br>(21.8–49.7)               | 7<br>(238)                        |

AA, alopecia areata; 95% CI, 95% confidential interval; PA, patchy alopecia; AT, alopecia totalis; AU, alopecia universalis

**eTable 4. Treatment-related adverse effects**

| <b>Adverse effects</b>            | <b>Incidence rate (%)<br/>(95% confidence<br/>interval [%])</b> | <b>No. of<br/>studies</b> | <b>No. of<br/>patients</b> |
|-----------------------------------|-----------------------------------------------------------------|---------------------------|----------------------------|
| Severe eczema                     | 30.8 (22.7–40.3)                                                | 13                        | 1220                       |
| Lymphadenopathy                   | 25.7 (18.2–35.0)                                                | 24                        | 1213                       |
| Generalized eczema                | 15.8 (10.1–23.8)                                                | 17                        | 814                        |
| Hyperpigmentation                 | 12.7 (4.7–30.2)                                                 | 5                         | 304                        |
| Influenza-like symptoms           | 11.1 (5.2–21.9)                                                 | 7                         | 239                        |
| Contact urticaria                 | 9.0 (5.2–15.2)                                                  | 7                         | 295                        |
| Folliculitis                      | 7.1 (3.6–13.6)                                                  | 4                         | 116                        |
| Hypopigmentation                  | 5.5 (3.0–9.7)                                                   | 11                        | 549                        |
| Erythema multiforme-like eruption | 1.7 (0.6–4.4)                                                   | 3                         | 246                        |

## eReferences

29. Cotellessa C, Peris K, Caracciolo E, Mordenti C, Chimenti S. The use of topical diphenylcyclopropenone for the treatment of extensive alopecia areata. *J Am Acad Dermatol*. 2001;44(1):73-76.
30. Thuangtong R, Varothai S, Triwongwanat D, Rujitharanawong C. Multi-concentration level patch test guided diphenyl cyclopropenone (Diphenylcyclopropenone) treatment in alopecia totalis or alopecia universalis. *J Med Assoc Thai*. 2017;100(1):86-92.
31. Tiwary AK, Mishra DK, Chaudhary SS. Comparative study of efficacy and safety of topical squaric acid dibutylester and diphenylcyclopropenone for the treatment of alopecia areata. *N Am J Med Sci*. 2016;8(6):237-242.
32. Lamb RC, Young D, Holmes S. Retrospective review of diphencyprone in the treatment of alopecia areata. *Clin Exp Dermatol*. 2016;41(4):352-358.
33. Durdu M, Ozcan D, Baba M, Seckin D. Efficacy and safety of diphenylcyclopropenone alone or in combination with anthralin in the treatment of chronic extensive alopecia areata: a retrospective case series. *J Am Acad Dermatol*. 2015;72(4):640-650.
34. Chiang KS, Mesinkovska NA, Piliang MP, Bergfeld WF. Clinical efficacy of diphenylcyclopropenone in alopecia areata: retrospective data analysis of 50 patients. *J Investig Dermatol Symp Proc*. 2015;17(2):50-55.
35. Luk NM, Chiu LS, Lee KC, et al. Efficacy and safety of diphenylcyclopropenone among Chinese patients with steroid resistant and extensive alopecia areata. *J Eur Acad Dermatol Venereol*. 2013;27(3):e400-405.
36. El Khoury J, Abd-el-Baki J, Succariah F, Abbas O, Kibbi AG, Kurban M. Topical immunomodulation with diphenylcyclopropenone for alopecia areata: the Lebanese experience. *Int J Dermatol*. 2013;52(12):1551-1556.
37. Dhurat R, Pund P, Ghate S. Diphencyprone (Diphenylcyclopropenone) in treatment of patchy alopecia areata (AA). *J Investig Dermatol*. 2013;133(5):1392.
38. Ohlmeier MC, Traupe H, Luger TA, Bohm M. Topical immunotherapy with diphenylcyclopropenone of patients with alopecia areata--a large retrospective study on 142 patients with a self-controlled design. *J Eur Acad Dermatol Venereol*. 2012;26(4):503-507.
39. Khan M, Gach JE. A retrospective study of diphencyprone therapy for alopecia areata in 60 patients. *Br J Dermatol*. 2011;165(Suppl. 1):45.
40. Bhat A, Sripathy K, Wahie S, Carr M. Efficacy and cost-efficiency of diphencyprone for alopecia areata. *Br J Dermatol*. 2011;165:43-44.
41. Avgerinou G, Gregoriou S, Rigopoulos D, Stratigos A, Kalogeromitros D, Katsambas A. Alopecia areata: topical immunotherapy treatment with diphencyprone. *J Eur Acad Dermatol Venereol*. 2008;22(3):320-323.
42. Sotiriadis D, Patsatsi A, Lazaridou E, Kastanis A, Vakirlis E, Chrysomallis F. Topical immunotherapy with diphenylcyclopropenone in the treatment of chronic extensive alopecia areata. *Clin Exp Dermatol*. 2007;32(1):48-51.
43. Ajith C, Gupta S, Kanwar AJ. Efficacy and safety of the topical sensitizer squaric acid dibutyl ester in alopecia areata and factors influencing the outcome. *J Drugs Dermatol*. 2006;5(3):262-266.
44. Kwon KS, Kim MB, Kwon YW, Park HJ, Oh CK, Jang HS. Squaric acid dibutyl ester (squaric acid dibutylester) immunotherapy in alopecia areata. *Korean J Dermatol*. 2005;43(5):630-637.
45. Dall'oglio F, Nasca MR, Musumeci ML, et al. Topical immunomodulator therapy with squaric acid dibutylester (Squaric acid dibutyl ester) is effective treatment for severe alopecia areata (AA): results of an open-label, paired-comparison, clinical trial. *J Dermatolog Treat*. 2005;16(1):10-14.
46. Mun JH, Ihm CW. Diphenylcyclopropenone (diphenylcyclopropenone) immunotherapy in severe alopecia areata - Clinical study of 36 cases. *Korean J Dermatol*. 2004;42(6):710-717.
47. Lee SG, Shin JH, Choi GS. Therapeutic effect of topical diphenylcyclopropenone (Diphenylcyclopropenone) for the treatment of extensive alopecia areata. *Korean J Dermatol*. 2004;42(9):1130-1137.
48. Wiseman MC, Shapiro J, MacDonald N, Lui H. Predictive model for immunotherapy of alopecia areata with diphencyprone. *Arch Dermatol*. 2001;137(8):1063-1068.
49. Pardasani AG, Turner E, McMichael AJ. Squaric acid dibutylester: indications for use and efficacy in alopecia areata. *Arch Dermatol*. 2001;137(7):970-972.
50. Pericin M, Trueb RM. Topical immunotherapy of severe alopecia areata with diphenylcyclopropenone: evaluation of 68 cases. *Dermatology (Basel, Switzerland)*. 1998;196(4):418-

421.

51. Amer M, Metwalli M, Tosson Z. Successful treatment of alopecia areata and alopecia totalis with diphencyprone. *J Eur Acad Dermatol Venereol*. 1997;9(1):83-84.
52. Weise K, Kretzschmar L, John SM, Hamm H. Topical immunotherapy in alopecia areata: anamnestic and clinical criteria of prognostic significance. *Dermatology (Basel, Switzerland)*. 1996;192(2):129-133.
53. Tosti A, Guidetti MS, Bardazzi F, Misciali C. Long-term results of topical immunotherapy in children with alopecia totalis or alopecia universalis. *J Am Acad Dermatol*. 1996;35(2 Pt 1):199-201.
54. Micali G, Cicero RL, Nasca MR, Sapuppo A. Treatment of alopecia areata with squaric acid dibutylester. *Int J Dermatol*. 1996;35(1):52-56.
55. van Baar HM, van der Vleuten CJ, van de Kerkhof PC. Dapsone versus topical immunotherapy in alopecia areata. *Br J Dermatol*. 1995;133(2):270-274.
56. Orecchia G, Malagoli P, Santagostino L. Treatment of severe alopecia areata with squaric acid dibutylester in pediatric patients. *Pediatr Dermatol*. 1994;11(1):65-68.
57. Shapiro J, Tan J, Ho V, Abbott F, Tron V. Treatment of chronic severe alopecia areata with topical diphenylcyclopropenone and 5% minoxidil: a clinical and immunopathologic evaluation. *J Am Acad Dermatol*. 1993;29(5 Pt 1):729-735.
58. van der Steen PH, Boezeman JB, Happle R. Topical immunotherapy for alopecia areata: re-evaluation of 139 cases after an additional follow-up period of 19 months. *Dermatology (Basel, Switzerland)*. 1992;184(3):198-201.
59. Hull SM, Cunliffe WJ. Successful treatment of alopecia areata using the contact allergen diphencyprone. *Br J Dermatol*. 1991;124(2):212-213.
60. Chun DK, Eun HC, Lee YS. Treatment of alopecia areata with diphencyprone. *Korean J Dermatol*. 1991;29(3):407-413.
61. Berth-Jones J, Hutchinson PE. Treatment of alopecia totalis with a combination of inosine pranobex and diphencyprone compared to each treatment alone. *Clin Exp Dermatol*. 1991;16(3):172-175.
62. Monk B. Induction of hair growth in alopecia totalis with diphencyprone sensitization. *Clin Exp Dermatol*. 1989;14(2):154-157.
63. Hull SM, Norris JF. Diphencyprone in the treatment of long-standing alopecia areata. *Br J Dermatol*. 1988;119(3):367-374.
64. Caserio RJ. Treatment of alopecia areata with squaric acid dibutylester. *Arch Dermatol*. 1987;123(8):1036-1041.
65. Valsecchi R, Cainelli T, Foiadelli L, Rossi A. Topical immunotherapy of alopecia areata. A follow-up study. *Acta Derm Venereol*. 1986;66(3):269-272.
66. Valsecchi R, Cainelli T, Tornaghi A, et al. Squaric acid dibutylester treatment of alopecia areata. *Clin Exp Dermatol*. 1985;10(3):233-238.
67. Case PC, Mitchell AJ, Swanson NA, Vanderveen EE, Ellis CN, Headington JT. Topical therapy of alopecia areata with squaric acid dibutylester. *J Am Acad Dermatol*. 1984;10(3):447-450.
68. Giannetti A, Orecchia G. Clinical experience on the treatment of alopecia areata with squaric acid dibutyl ester. *Dermatologica*. 1983;167(5):280-282.
69. Flowers FP, Slazinski L, Fenske NA, Pullara TJ. Topical squaric acid dibutylester therapy for alopecia areata. *Cutis*. 1982;30(6):733-736.
